# Supplementary material for: High Intratumoral Expression of Tetranectin Associates with Poor Prognosis of Patients with Gastric Cancer after Gastrectomy
Source: PubMed Central journal article supplement — J Cancer. 2017 Oct 9;8(17):3623–30. doi: 10.7150/jca.19438 (PMC5687179; doi:10.7150/jca.19438), 2017-10-09
Supplement: jcav08p3623s1.pdf [file jcav08p3623s1.pdf]

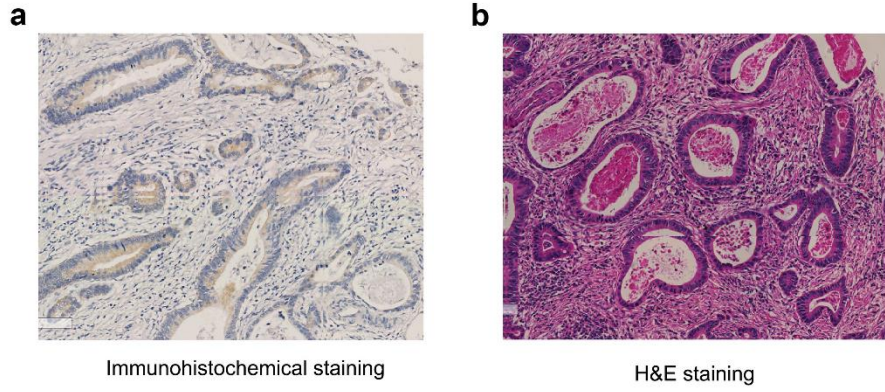

Figure S1. Immunohistochemical staining and corresponding H&E staining pictures

(a) Immunohistochemical staining . (b)H&E staining

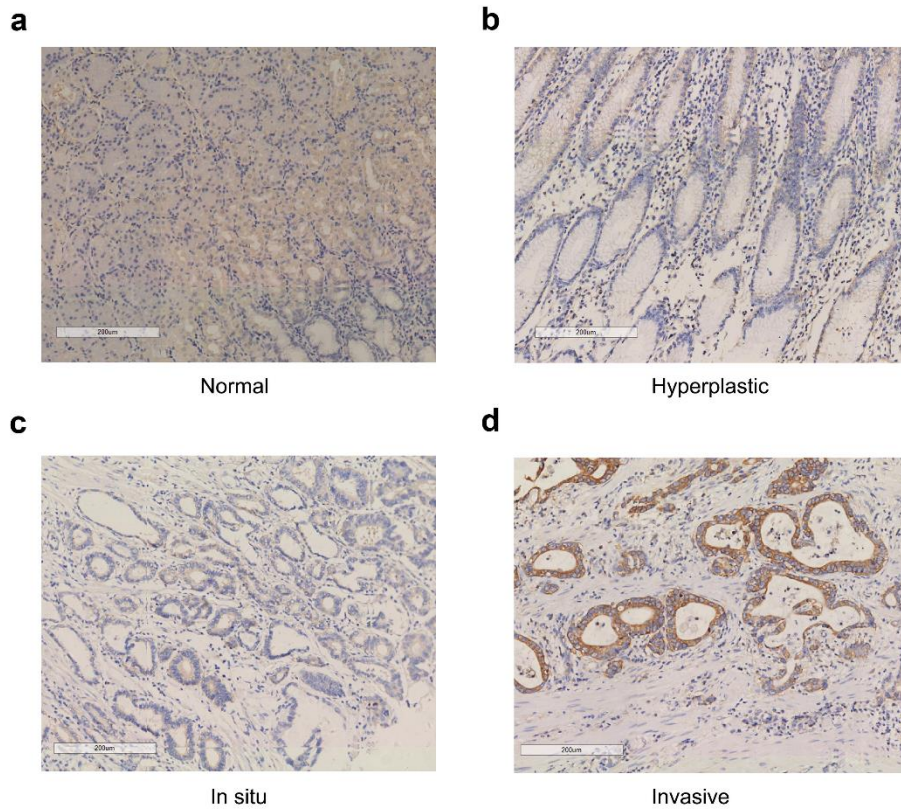

Figure S2. The expression of tetranectin among different tissue components of the same patient. (a) Normal part. (b) Hyperplastic part. (c) In situ part. (d) Invasive part.
